# Supplementary material
Source: publisher figshare collection journal article supplement (https://springernature.figshare.com/ndownloader/files/10386879)
Supplement: Supplementary file [file 10386879]

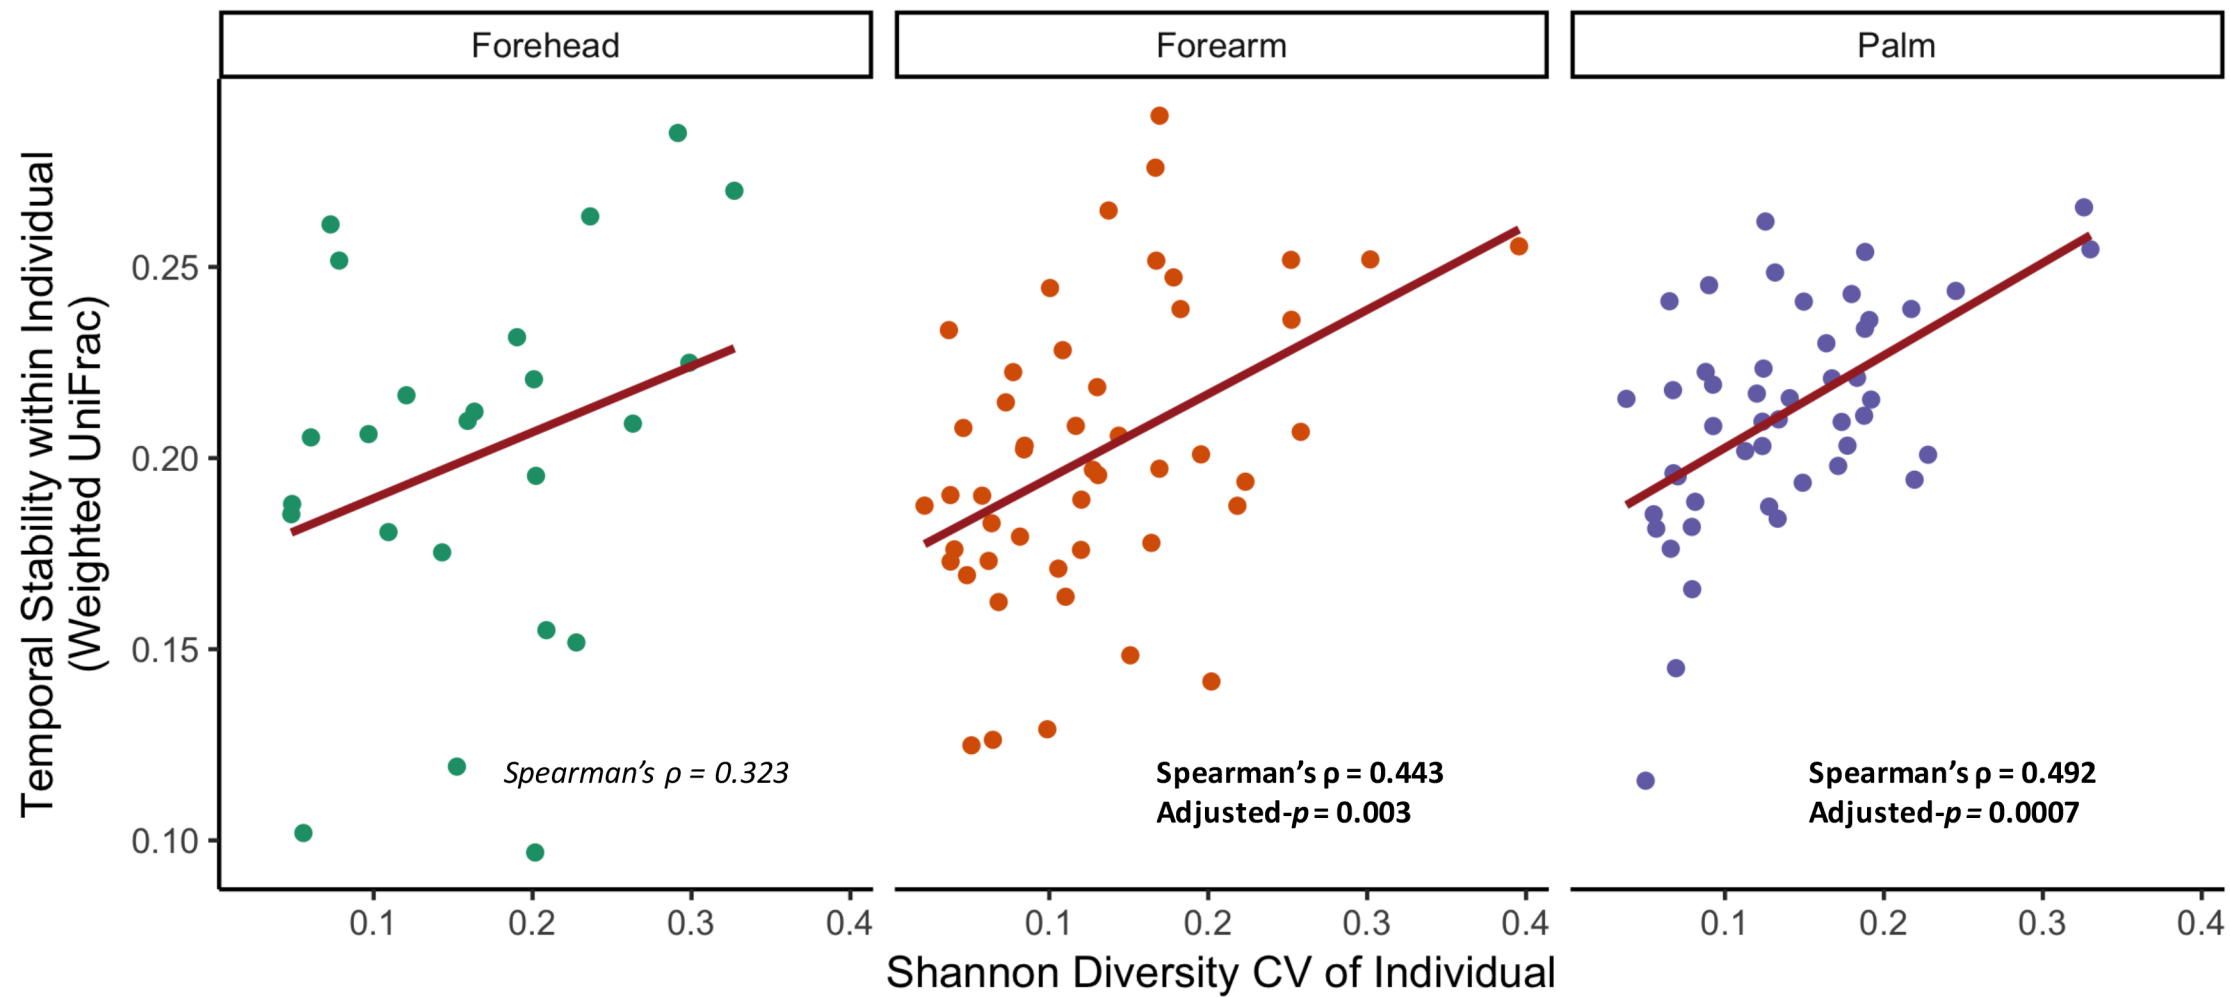

Additional File 11: Figure S7
